# Supplementary material
Source: PubMed Central journal article supplement (PMC2666022)

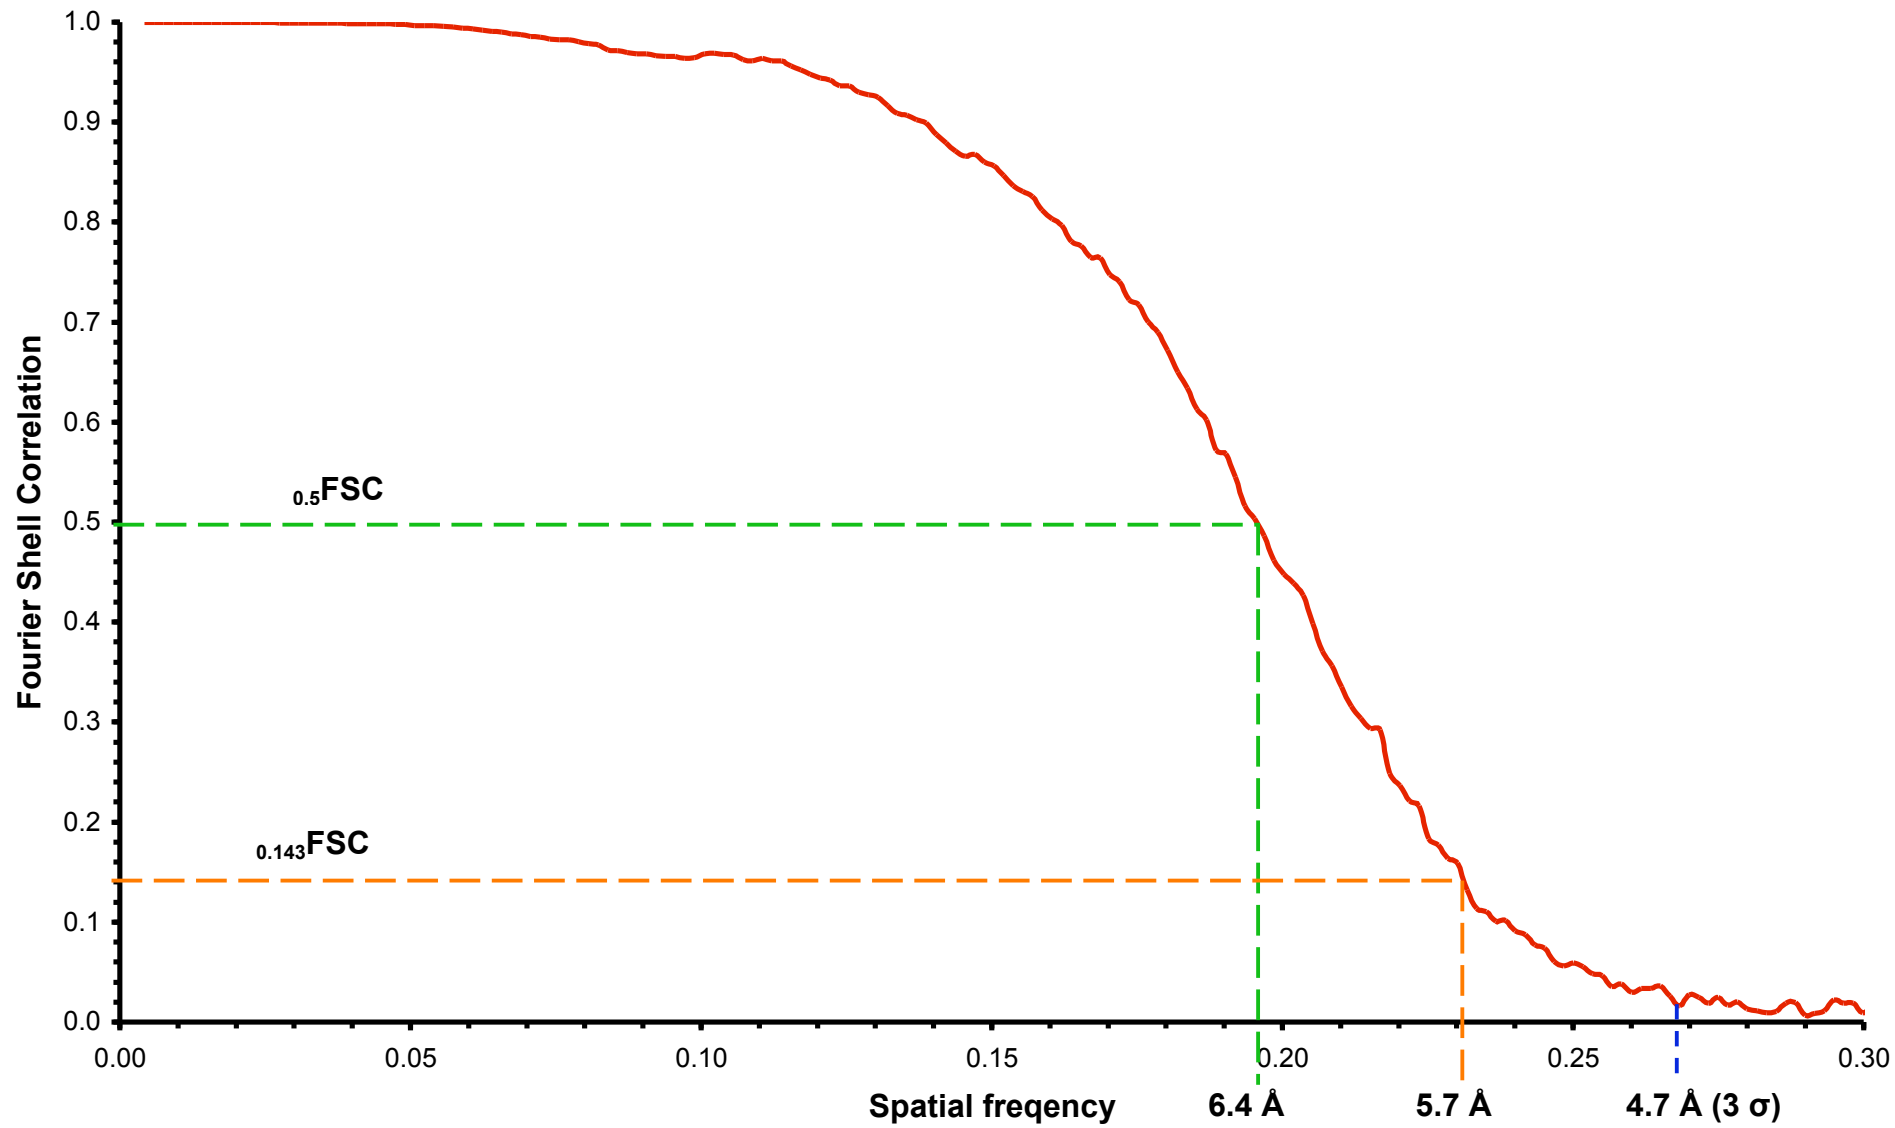

Supplement: emboj200926s5.pdf [file emboj200926s5.pdf]
